# Supplementary material for: Brazilian Red Propolis Attenuates Hypertension and Renal Damage in 5/6 Renal Ablation Model
Source: PLoS One. 2015 Jan 21;10(1):e0116535. doi: 10.1371/journal.pone.0116535 (PMC4301812; doi:10.1371/journal.pone.0116535)
Supplement: S1 Table — Values represent the individual measures obtained from each animal in each evaluated parameter. The acronyms of experimental groups (S, S+RP, NX, NX+RP) are in red, in the top of the second column. The numbers in bold below each acronym are the rats identification. SD: standard deviation, SE: standard error and N: number of animals analyzed regarding each parameter. (XLS) [file pone.0116535.s001.xls]

## Sheet: Proteinurias
Proteinúria 24 h			observação	1º mês	2º mês	3º mês de tratamento					Proteinúria 24 h		observação	1º mês	2º mês	3º mês de tratamento				PROTEINÚRIA DE 24H
Grupo	rato nº	basal	30	60	90	120 dias após a ablação					CN	basal	30	60	90	120 dias após a ablação				Nx + PV + L		observação	1º mês	2º mês	3º mês de tratamento
Nx + PV	52	13.6	94.3	104.7	145.95	141	perfusão				54	9.4	15.8	22.3	17.99	16.3					basal	30	60	90	120 dias após a ablação
Nx + PV	53	10.2	148.6	98	110.18	142.7	perfusão				56	13.4	30	26.3	36.26	28.3				232		168.8	241.3	192.62			não perfundido
CN	54	9.4	15.8	22.3	17.99	16.3	perfusão				72	14.5	21	21	22.4	18.6				238		161.3	151.5	311.7			não perfundido
Nx + PV	55	7.4	63.7	114	159.23	180.3	perfusão				108	29.7	10.5	17.7	16.1					239		186.5	260.4	248.1			não perfundido
CN	56	13.4	30	26.3	36.26	28.3	perfusão				114	10.7	16.3	16.1	21.6					241		113	68.13	252			1.05
Nx	61	13	23.5	excluido							121	11.9	8.1	21.5	29					248		169.6	101.8	328.8			1.01
Nx	62	11.4	23.8	excluido							167	13.2	19	16.5	15.4					255		259.2	218.3	286			2.3
Nx	63	16.6	28.2	excluido							141		13	14.8						256		123	95.9	obito
Nx	64	19.5	30.7	excluido																259		148.4	126.5	86
Nx	65	15.6	28.6	excluido							média	14.6857	16.7125	19.525	22.6786	21.0667				272		201.9	150.8	230.4
Nx	66	10.2	20.3	excluido							Des. Pa.	6.33481	6.40048	3.64374	7.00912	5.20021				275		159.1	162.6	200.3
Nx	67	14.4	40.7	67.1	excluido						CN + PV		observação	1º mês	2º mês	3º mês de tratamento
Nx	68	15.8	29.7	excluido								basal	30	60	90	120 dias após a ablação				média		158.1	133.95	172.233	#DIV/0!		1.45333
Nx	70	14.8	38.9	excluido							94	7.7	21.2	19.4	19.1					Des. Pa.		39.3298	25.5345	72.0569	#DIV/0!		0.733508
	rato nº	basal	30	60	90	120 dias					100	8	23.8	22.5	16.6
Nx	71	19.9	41.1	excluido							101	12.02	12.5	18.5	17.5
CN	72	14.5	21	21	22.4	18.6	perfusão				106	20.3	17	22.3	17
NP caut	73	8.7	31.8	óbito							107	17.3	20.3	23.4	21.1
Nx caut	79	14.9	103.7	182.4	óbito						129	12.2	6.8	8.9	12.7
Nx + PV	82	8.2	172.3	314.3	óbito						160	8.9	10.2	14.5	22.7
Nx	85	9.1	25.7	excluido																															CN	CN+PV	NX	NX+PV	NX+PV+L	NX+L
Nx	87	12.4	41.4	excluido																															54	94	93	52	241	242
Nx	90	8	55.4	excluido							média	12.3457	15.9714	18.5	18.1	#DIV/0!																			56	100	109	53	248
Nx	92	10.7	28.3	excluido							Des. Pa.	4.47667	5.82966	4.83174	3.02702	#DIV/0!																			72	101	136	55
Nx	93	3.8	160.7	379.8	236.5	prefusão					Nx		observação	1º mês	2º mês	3º mês de tratamento				PROTEINÚRIA DE 24H															108	106	162	102
CN + PV	94	7.7	21.2	19.4	19.1	21.4	perfusão					basal	30	60	90	120 dias após a ablação				Nx + L		observação	1º mês	2º mês	3º mês de tratamento										114	129	169	110
Nx	96	4	112.5	122.9	151.3	excluido					93	3.8	160.7	379.8	370						basal	30	60	90	120 dias após a ablação			Creatinina							121	160	178	151
Nx	97	11.6	204.4	386.3	óbito						97	11.6	204.4	386.3	386					231		109.8	58.2	164.7				0.86							167		179
	rato nº	basal	30	60	90	120 dias					109	25.7	59.1	257.7	254					236		258.3	138.8	318.8				0.71									177
CN + PV	100	8	23.8	22.5	16.6	25.9	perfusão				142	10.7	90							240		129.4	91.2	258.9				0.85									185
CN + PV	101	12.02	12.5	18.5	17.5	18.3	perfusão				136	5.9	28.5	203						242		114.2	119.4	164.5				1.1									186
Nx + PV	102	18.6	228.7	211.6	perfusão						145	7.7	140							251		143	88.3	286.4				6.58									222
Nx	103	16.9	120.3	26.1	óbito						158		279							247		201.9	OBITO														223
Nx	105	25.6	74.6	68.2	excluido						162	8.9	40.6	189.7	335.8					267		78.9	95.3	159.1
CN + PV	106	20.3	17	22.3	17	perfusão				2012	169	13.6	91	221.8	297					268		191.2	obito
CN + PV	107	17.3	20.3	23.4	21.1	perfusão					177	15.7	94.5	159.1	220.4					269		103.7	150.8	268
CN	108	29.7	10.5	17.7	16.1	perfusão					178	12.9	123.3	151.2	256.2
Nx	109	25.7	59.1	257.7	185	perfusão					179		114	177.5	233.5					média	#DIV/0!	124.6	123.05	#REF!	#DIV/0!			2.02
Nx + PV	110	21.3	130.1	169.1	121	perfusão					185		74	147.7	239					Des. Pa.	#DIV/0!	54.9065	30.3514	#REF!	#DIV/0!			2.55297
CN	114	10.7	16.3	16.1	21.6	perfusão					186		141	116.2	202.2
Nx	115	12.5	31.7	excluido							207	18.2	51.8	159.1	346.7
Nx	116	17.2	9	excluido							222		90.8	163.1	303.5
Nx	117	13.3	19.2	excluido							223		64.3	180.4	264.5
Nx + PV	118	11.5	117.1	213.4	óbito
Nx	119	11.9	15.8	107.7	150.9	excluido					média	12.2455	108.647	206.614	285.292	#DIV/0!
	rato nº	basal	30	60	90	120 dias					Des. Pa.	5.85373	61.4801	79.3184	57.047	#DIV/0!																			Creatinina
Nx	120	15.5	7.1	excluido							Nx + PV		observação	1º mês	2º mês	3º mês de tratamento																			0.19	0.18	3.67	0.5	1.05	1.1
CN	121	11.9	8.1	21.5	29	perfusão						basal	30	60	90	120 dias após a ablação																			0.16	0.29	1.82	0.35	1.01
Nx	122	8.7	6.2	184	54.3	perfusão	excluido				52	13.6	94.3	104.7	145.95	141																			0.16	0.3	2	0.82
Nx	123	5.6	16.8	excluido	excluido						53	10.2	148.6	98	110.18	142.7																			0.48	0.28	2.4	1.89
Nx	126	11.6	94	óbito							55	7.4	63.7	114	159.23	180.3																			0.44	0.34	0.95	1.54
CN + PV	129	12.2	6.8	8.9	12.7	perfusão					82	8.2	172.3	314.3																					0.46	0.28	0.71	1.34
Nx	133	7.7	84	88.1	excluido						102	18.6	228.7	211.6																					0.44		4.55
Nx	135	6.4	42.4	187.4	obito						110	21.3	130.1	169.1	121																						0.94
Nx	136	7.9	28.5	203.1	obito						118	11.5	117.1	213.4																							1.43
Nx	138	16	143.8	116.1	excluido						148	11.8	117.6																								0.67
Nx	139	9.9	128.3	85.7	excluido						151	16.2	55.5	253.4	265.6																						1.06
	rato nº	basal	30	60	90	120 dias																															1.07
CN	141	8.2	13	14.8		perfusão ??????					média	13.2	125.322	184.813	160.392	154.667
Nx	142	10.7	90	óbito							Des. Pa.	4.42744	50.7944	72.6479	55.4105	18.1388
Nx	143	7	41.3	excluido
Nx	144	8.7	61	159.3	perfusão
Nx	145	7.7	140	óbito								basal	30	60	90	120 dias
Nx	146	7	54	excluido							CN	15	17	20	25.5
Nx + PV	148	11.8	117.6	óbito							CN + PV	13	17	19	18.2
Nx	149	11.5	óbito								Nx	13.7	141.4	341.2	336.6
Nx + PV	151	16.2	55.5	perfusão							Nx + PV	13	136.4	175	134.1
Nx	152	18.9	37.1	excluido
Nx	153		38.7	excluido
Nx	155		14	perfusão
Nx	156		16.1	excluido
Nx	158		279	óbito
Nx	159	10.7	14.5	excluido
CN + PV	160	10.1	10.2			perfusão
Nx	162	8.9	19.6	excluido
Nx	163	9.7	14.5	excluido
Nx	164	10.8	136.4	óbito
2012	rato nº	basal	30	60	90
	165		obito
	166		obito P.A.
CN	167		19	16.5	15.4	perfusão
	168		obito 48h
NX	169		91	221.8	297	perfusão
NX	170		obito 48h
CAUT	171		obito P.A.
CAUT	172		Eutanasia - Rim necrosado
CAUT	173		47.5	obito (obs)
CAUT	174		23.5	36.8	71.5	perfusão
	175		Eutanasia - Lesão de artéria
Nx	176		243.6	200.9	perfusão
Nx	177		94.5	159.1	220.4	perfusão
Nx	178		123.3	151.2	256.2	perfusão
Nx	179		114	177.5	233.5	perfusão
Nx	180		307.8	obito
Nx	181		304.3	obito
Nx	182		243	perfusão
Nx	183		obito
Nx	184		207	obito
Nx	185		74	147.7	239	perfusão
Nx	186		141	116.2	202.2	perfusão
CAUT	187		15.3	32.5	65	excluido
CAUT	188		21.4	45.5	92.6	perfusão
NX	189		Eutanasia -Lesão de artéria						Proteinúria 30 dias pós ablação								Proteinúria 60 dias pós ablação								Proteinúria 90 dias pós ablação
Nx	190	16.1	obito 48h							GRUPOS								GRUPOS								GRUPOS
Nx	191	18	266.9	172.6	obito (obs)					CN	CN+PV	NX	NX+PV	NX + PV + L	NX + L			CN	CN+PV	NX	NX+PV	NX + PV + L	NX + L			CN	CN+PV	NX	NX+PV	NX + PV + L	NX + L
Nx	192	15.2	obito 48h						1	54	94	93	52	241	231		1	54	94	93	52	241	231		1	54	94	93	52	241	231
CAUT	193	20	obito 48h						2	56	100	109	53	248	242		2	56	100	109	53	248	242		2	56	100	109	53	248	242
NX	194	15.9	29.6	137.4	12.5	perfusão			3	72	101	162	55	259	267		3	72	101	162	55	259	267		3	72	101	162	55	259	267
Nx	195	15.2	Eutanádia -Lesão arterial						4	108	106	169	102	272	269		4	108	106	169	102	272	269		4	108	106	169	102	272	269
Nx	196	16.3	obito 48h						5	114	107	177	110	275			5	114	107	177	110	275			5	114	107	177	110	275
Nx	197	15.6	obito 48h						6	121	129	178	151				6	121	129	178	151				6	121	129	178	151
Nx	198	15.7	130.7	obito (obs)					7	167	160	179	213				7	167	160	179	213				7	167	160	179	213
Nx	199	15.7	obito P.A.						8	141		207					8	141		207					8	141		207
Nx	200	9.3	obito						9			222					9			222					9			222
Nx	201	9.8	obito intra-cirurgico						10			223					10			223					10			223
Nx	202	11.8	obito 48h						11								11								11
Nx	203	15.6	obito 48h						12								12								12
Nx	204	19.6	obito 48h						13								13								13
CAUT	205	18.7	28.2	139	189.6	343.3	perfusão		14								14								14
CAUT	206	18.3	obito							CN	CN+PV	NX	NX+PV	NX + PV + L	NX + L			CN	CN+PV	NX	NX+PV	NX + PV + L	NX + L			CN	CN+PV	NX	NX+PV	NX + PV + L	NX + L
Nx	207	18.2	51.8	159.1	346.7	perfusão			1	15.8	21.2	160.7	94.3	113	109.8		1	22.3	19.4	379.8	104.7	68.13	58.2		1	17.99	19.1	370	145.95	252	164.7
Nx	208	15.2	275.1	117	perfusão	(teve que diluir a amostra)			2	30	23.8	59.1	148.6	169.6	114.2		2	26.3	22.5	257.7	98	101.8	119.4		2	36.26	16.6	254	110.18	328.8	164.5
Nx	209	18.2	10.1	9.4	excluido				3	21	12.5	40.6	63.7	148.4	78.9		3	21	18.5	189.7	114	126.5	95.3		3	22.4	17.5	335.8	159.23	86	159.1
Nx	210	20.1	obito 48h						4	10.5	17	91	228.7	201.9	103.7		4	17.7	22.3	221.8	211.6	150.8	150.8		4	16.1	17	297	perfusão ??	230.4	268
Nx	211	26.4	obito 48h						5	16.3	20.3	94.5	130.1	159.1			5	16.1	23.4	159.1	169.1	162.6			5	21.6	21.1	220.4	121	200.3
Nx	212	11.2	obito 48h						6	8.1	6.8	123.3	55.5				6	21.5	8.9	151.2	253.4				6	29	12.7	256.2	265.6
Nx + PV	213	10.2	137.7	244.3	191.2	perfusão			7	19	10.2	114	137.7				7	16.5	14.5	177.5	244.3				7	15.4	22.7	233.5	191.2
Nx	214	9.1	obito 48h						8	13		51.8					8	14.8		159.1					8			346.7
CAUT	215	11.8	80.4	195.1	312	472			9			90.8					9			163.1					9			303.5
Nx	216	11.1	obito 48h						10			64.3					10			180.4					10			264.5
Nx + PV	217	11.4	299.7	392.4	obito				11								11								11
Nx	218	18.4	14.9	12.2	excluido				12								12								12
Nx	219	19.2	33.2	73.1	140.6	excluido			13								13								13
Nx	220	10.1							14								14								14
CAUT	221	4.9	20.1	91.4	217.6	432			média	16.7125	15.9714	89.01	122.657	158.4	101.65		média	19.525	18.5	203.94	170.729	121.966	105.925		média	22.6786	18.1	288.16	165.527	219.5	189.075
Nx	222	8.9	90.8	163.1	303.5	perfusão			Des. Pa.	6.8424	6.29675	36.8335	59.1466	32.3239	15.7659		Des. Pa.	3.89533	5.21888	69.9702	66.8179	38.1053	39.0978		Des. Pa.	7.57072	3.26956	50.591	56.82	88.4766	52.6806
Nx	223	7	64.3	180.4	264.5	perfusão
Nx	224	5.5	90.7	70.7	obito
Nx	225	4.2	35.5	97.5	145	excluido						NX	NX+PV	NX + PV + L	NX + L					NX	NX+PV	NX + PV + L	NX + L
Nx	229		185.6	131.1	excluido						30	88.8683	122	158	101					204	170	122	106
Nx	230	17.7	obito 48h								60	204	170	122	106
NX + L	231		109.8	58.2	164.7	perfusão	ecluido				90	288	165	219	189
NX+PV+L	232		168.8	241.3	192.62	excluido					% redução (60)	129	39	-23	-5
CAUT+PV	233		335.9	obito							% redução (90)	214	35	38	81
	234		50.7	85.2	excluido
	235	obito																	204	170
NX + L	236		258.3	138.8	318.8	perfusão
CAUT+PV	237		201	obito
NX+PV+L	238		161.3	151.5	311.7	excluido
NX+PV+L	239		186.5	260.4	248.1	excluido
NX + L	240		129.4	91.2	258.9	perfusão
NX+PV+L	241		113	68.13	252	perfusão
NX + L	242		114.2	119.4	164.5	perfusão
	243	obito
	244		19.1	excluido
	245		21.04	excluido
	246		22.8	excluido
NX + L	247		201.9	obito
NX+PV+L	248		169.6	101.8	328.8	perfusão
	249		57.8	81.6	excluido
	250	obito
NX + L	251		143	88.3	286.4	perfusão
	252		11.4	excluido
	253		28.8	excluido
	254		19.4	excluido
NX+PV+L	255		259.2	218.3	286	perfusão
NX+PV+L	256		123	95.9
NX+PV+L	259		148.4	126.5	86	perfusão
	257		16.9	excluido
	265		30.5	excluido
	266		45.1	excluido
NX + L	267		78.9	95.3	159.1	perfusão
NX + L	268		191.2	obito
NX + L	269		103.7	150.3	268	perfusão
	270		23.2	excluido
	271		25.6	excluido
NX+PV+L	272		201.9	167.2	230.4	perfusão
	273		13.3	excluido
	274		53.1	excluido
NX+PV+L	275		159.1	162.6	200.3	perfusão
	rato nº	basal	30	60	90	120 dias
	276		23.6	excluido
	277		excluido
	278		excluido
NX	279	OBITO
	280		15	62	50	excluido
NX	281		217	OBITO
NX	282		52	190	205	perfusão
NX	283	OBITO
NX	284		30	331	324	perfusão
NXPV	285		76	207	301	perfusão
NX	286		OBITO
NX	287	OBITO
	288		16.6	118	209	excluido
NX	289		118	154	OBITO
NXCAUT	290	OBITO
NXCAUT	291		8.4	97	170	perfusão
NXCAUT	292		21	40	123	perfusão
NXCAUT	293		13	56	123	perfusão
NXCAUT	294		15	67	194	perfusão
NXCAUT	295		OBITO
NX	296	OBITO
NXPV	297		90	219	247	perfusão
	298		11.5	40	50	excluido
NXPV	299		55	168	159	perfusão
	300		43	140	246	excluido
NX	301	OBITO

## Sheet: Pressões
Pressão Caudal Sistólica (TCP)			1º mês	2º mês	3º mês de tratamento						TCP	observação	1º mês	2º mês	3º mês de tratamento				TCP	observação	1º mês	2º mês	3º mês de tratamento
Grupo	rato nº	30	60	90	120 dias após a ablação						CN	30	60	90	120 dias após a ablação				NX+PV+L	30	60	90	120 dias após a ablação
Nx + PV	52	165.857	165.278	136.778	131.333	perfusão					54	118.727	117.944	128.667	114.111				232	160.2	154	142.63
Nx + PV	53	198571	162.056	152	137.667	perfusão					56	129.909	105.611	118.222	119.778				238	141.2	140.7	134.62
CN	54	118.727	117.944	128.667	114.111	perfusão					72	114.944	129.667	115.778	107.222				239	140.55	146.16	124
Nx + PV	55	164.308	145.167	141.333	147.889	perfusão					108	119.333	112	109.3					241	175.66	141	137
CN	56	129.909	105.611	118.222	119.778	perfusão					114	116.333	126.111	129					248	155.25	143.2	129.5
Nx	61	121.389	excluido								121	120.333	127.556	126.5					255	163.6	não obitida	não obitida
Nx	62	138.667	excluido								167	122	118.16	109.84					256	177.64	153.37	obito
Nx	63	129.667	excluido								141	119.22	124.1						259	159.92	149.9	144.8
Nx	64	139.778	excluido																272	168.42	130.5	125.16
Nx	65	132	excluido																275	154.87	145	150.8
Nx	66	118.111	excluido								média	120.1	120.144	119.615	113.704				média	159.731	142.937	136.064	#DIV/0!
Nx	67	147.222	118.556	excluido							Des. Pa.	4.24112	7.77152	7.89238	5.13387				Des. Pa.	11.9172	6.5524	8.9935	#DIV/0!
Nx	68	138.222	excluido								TCP	observação	1º mês	2º mês	3º mês de tratamento				TCP	observação	1º mês	2º mês	3º mês de tratamento
Nx	70	128.444	excluido								CN + PV	30	60	90	120 dias após a ablação				NX+ L	30	60	90	120 dias após a ablação
	rato nº	30	60	90	120 dias após a ablação						94	114.111	110.111	115.333	113.44				231	145.87	130.1	137.7
Nx	71	121.111	excluido								100	110.444	103	107.889	106.33				236	165.6	115.85	133.37
CN	72	114.944	129.667	115.778	107.222	perfusão					101	108.667	108	101.333	104.77				240	163.7	137.33	132
NP caut	73	122.444	óbito								106	116.556	110.778	104.667					242	150	133.18	143.8
Nx caut	79	113.667	122.444	óbito							107	116.111	107.222	103.556					247	159	obito
Nx + PV	82	184.556	170.222	óbito							129	117.444	101.889	100.1					251	151.25	156.25	144
Nx	85	101.556	excluido																267	171.91	131.3	139.5
Nx	87	125.75	excluido																268	160.44	obito
Nx	90	129.889	excluido																269	151.5	131.1	138
Nx	92	123.222	excluido
Nx	93	171.333	185.111	180.66	perfusão						média	113.889	106.833	105.48	108.18				média	157.697	133.587	138.339	#DIV/0!
CN + PV	94	114.111	110.111	115.333	113.44	perfusão					Des. Pa.	3.26283	3.34058	5.05627	3.77351				Des. Pa.	8.08849	11.1225	4.28643	#DIV/0!
Nx	96	124.889	123.444	142.778	excluido						TCP	observação	1º mês	2º mês	3º mês de tratamento
Nx	97	166.333	182.556	óbito							Nx	30	60	90	120 dias após a ablação
	rato nº	30	60	90	120 dias após a ablação						93	171.333	185.111	180.66
CN + PV	100	110.444	103	107.889	106.33	perfusão					97	166.333	182.556
CN + PV	101	108.667	108	101.333	104.77	perfusão					109	167.889	176.778	181.2
Nx + PV	102	170.778	164.889	perfusão							142	195.22
Nx	103	133.889	excluido								136			185.4
Nx	105	138.778	144.556	excluido							145	189.44
CN + PV	106	116.556	110.778	104.667	perfusão						158	171.5
CN + PV	107	116.111	107.222	103.556	perfusão						162	165	180	181
CN	108	119.333	112	109.2	perfusão					2012	169	154	144.5	162
Nx	109	167.889	176.778	181.2	perfusão						177	142.3	161.1	166.53
Nx + PV	110	153.444	144.778	177.4	perfusão						178	176.5	176.54	174
CN	114	116.333	126.111	129	perfusão						179	162.86	170.46	170.8
Nx	115	113.444	excluido								185	124.71	147.2	163.3
Nx	116	139.778	excluido								186	116.28	160	158.87
Nx	117	128.889	excluido								207	152	157.33	164.68
Nx + PV	118	188.778	159	óbito
Nx	119	153.778	128.444	excluido
	rato nº	30	60	90	120 dias após a ablação
Nx	120	106.444	excluido
CN	121	120.333	127.556	126.5							média	161.098	167.416	171.676	#DIV/0!
Nx	122	162.333		182.3	excluido						Des. Pa.	21.2618	13.522	8.82184	#DIV/0!
Nx	123	124.222	excluido
Nx	126	169.667	óbito
CN + PV	129	117.444	101.889	100.1	perfusão
Nx	133	123.556	excluido
Nx	135	112.778	126	excluido
Nx	136	122.333		185.4	perfusão
Nx	138	115.889	excluido
Nx	139	132.556	excluido
	rato nº	30	60	90	120 dias após a ablação						TCP	observação	1º mês	2º mês	3º mês de tratamento					30	60	90
CN	141	119.22	124.1								Nx + PV	30	60	90	120 dias após a ablação				52	165.857	165.278	136.778
Nx	142	195.22	óbito								52	165.857	165.278	136.778	131.333				53	198.571	162.056	152
Nx	143	122.11	140.8	excluido							53	198.571	162.056	152	137.667				55	164.308	145.167	141.333
Nx	144	108.55	163.2								55	164.308	145.167	141.333	147.889				102	170.778	164.889	perfusão ??
Nx	145	189.44	óbito								82	184.556	170.222						110	153.444	144.778	177.4
Nx	146	121.11	excluido								102	170.778	164.889						151	216.6	180	176
Nx + PV	148	220.7									110	153.444	144.778	177.4
Nx + PV	151	216.6									118	188.778	159
Nx	152	122.5	excluido								148	220.7
Nx	153	118.2	excluido								151	216.6	180	176
Nx	155	168
Nx	156	118.2	excluido								média	184.844	161.424	156.702	138.963
Nx	158	171.5									Des. Pa.	22.2714	11.1636	17.0652	6.82065
Nx	159	139.3	excluido
Nx	162	155.3
CN + PV	160	110.7
	rato nº	30	60	90										TCP	30	60	90 dias
	169	154	144.5	162	perfusão									CN	119.18	119.81	120
CN	167	122	118.16	109.84	perfusão									CN + PV	113	107	106.5
	176	156	168.7	perfusão										Nx	169	181.4	180.6
Nx caut	173	118.6	obito											Nx + PV	175	161	156
Nx caut	174	109.81	112.53	128.93	perfusão
	181	177.46	obito
	180	142.8	obito
	179	162.86	170.46	170.8	perfusão
	177	142.3	161.1	166.53	perfusão
	178	176.5	176.54	174	perfusão
	184	123.91	obito
	185	124.71	147.2	163.3	perfusão
	186	116.28	160	158.87	perfusão
	182	179.61	obito
Nx caut	187	129.2	141.06	129.8	perfusão
Nx caut	188	132.5	129.5	127.6	perfusão
	191	160.75	166
	194	141.07	150.83	151.6
	198	148.36	obito
Nx caut	205	121.8	126.27	121.44	126
	207	152	157.33	164.68	perfusão
	208	145 OBS	151
	209	128.5
	213	146.06	137.2	149	perfusão
Nx caut	215	107.7	117.83	118.88	114.77
	217	129.4	141.16	OBITO
	218	112	136.75	OBITO
	219	126.5	123.5	excluido
Nx caut	221	130.4	118.81	126.47	122.81	perfusão
	222	141.7	143.58	186.16	perfusão						Pressão 30 dias pós ablação								Pressão 60 dias pós ablação								Pressão 90 dias pós ablação
	223	136.85	168.4	150.1	perfusão							GRUPOS								GRUPOS								GRUPOS
	224	150.5	obito									CN	CN+PV	NX	NX+PV	NX+PV+L	NX + L			CN	CN+PV	NX	NX+PV	NX + PV + L	NX + L			CN	CN+PV	NX	NX+PV	NX + PV + L	NX + L
	225	143.2	160.5	141.63							1	54	94	93	52	241	231		1	54	94	93	52	241	231		1	54	94	93	52	241	231
	229	116.8	138.85	excluido							2	56	100	109	53	248	242		2	56	100	109	53	248	242		2	56	100	109	53	248	242
NX + L	231	145.87	130.1	137.7	perfusão						3	72	101	162	55	259	267		3	72	101	136	55	259	267		3	72	101	136	55	259	267
NX+PV+L	232	160.2	154	142.63	excluido						4	108	106	169	102	272	269		4	108	106	162	102	272	269		4	108	106	162	102	272	269
CAUT+PV	233	122.81	obito								5	114	107	177	110	275			5	114	107	169	110	275			5	114	107	169	110	275
	234	137.8	excluido								6	121	129	178	151				6	121	129	177	151				6	121	129	177	151
NX + L	236	165.6	115.85	133.37	perfusão						7	167	160	179	213				7	167	160	178	213				7	167	160	178	213
CAUT+PV	237	125	obito								8	141		207					8	141		179					8	141		179
NX+PV+L	238	141.2	140.7	134.62	excluido						9			222					9			185					9			185
NX+PV+L	239	140.55	146.16	124	excluido						10			223					10			186					10			186
NX + L	240	163.7	137.33	132	perfusão						11								11			207					11			207
NX+PV+L	241	175.66	141	137	perfusão						12								12								12
NX + L	242	150	133.18	143.8	perfusão						13								13								13
	244	135	excluido								14								14								14
	245	163.1	excluido									CN	CN+PV	NX	NX+PV	NX+ PV+L	NX + L			CN	CN+PV	NX	NX+PV	NX+ PV+L	NX + L			CN	CN+PV	NX	NX+PV	NX+ PV+L	NX + L
	246	118.27									1	118.727	114.111	171.333	165.857	175.66	145.87		1	117.944	110.111	185.111	165.278	141	130.1		1	128.667	115.333	180.66	136.778	137	137.7
NX + L	247	159	obito								2	129.909	110.444	167.889	198.571	155.25	150		2	105.611	103	176.778	162.056	143.2	133.18		2	118.222	107.889	181.2	152	129.5	143.8
NX+PV+L	248	155.25	143.2	129.5	perfusão						3	114.944	108.667	165	164.308	159.92	171.91		3	129.667	108	180	145.167	149.9	131.3		3	115.778	101.333	185.4	141.333	144.8	139.5
	249	138.2	excluido								4	119.333	116.556	154	170.778	168.42	151.5		4	112	110.778	144.5	164.889	130.5	131.1		4	109.3	104.667	162	perfusão ??	125.16	138
NX + L	251	151.25	156.25	144	perfusão						5	116.333	116.111	142.3	153.444	154.87			5	126.111	107.222	161.1	144.778	145			5	129	103.556	166.53	177.4	150.8
	252	129.62	excluido								6	120.333	117.444	176.5	216.6				6	127.556	101.889	176.54	180				6	126.5	100.1	174	176
	253	128.22	excluido								7	122	110.7	162.86	146.06				7	118.16		170.46	137.2				7	109.84		170.8	149
	254	121.25	excluido								8	119.22		152					8	124.1		157.33					8			164.68
NX+PV+L	255	163.6	não obitida	não obitida							9			141.7					9			143.58					9			186.16
	256	177.64	153.37								10			136.85					10			168.4					10			150.1
	259	159.92	149.9	136.75							11								11								11
NX + L	267	171.91	131.3	139.5							12								12								12
	266	158									13								13								13
NX + L	268	160.44	obito								14								14								14
	265	118									média	120.1	113.433	157.043	173.66	162.824	154.82		média	120.144	106.833	166.38	157.052	141.92	131.42		média	119.615	105.48	172.153	155.419	137.452	139.75
	270	123.5									Des. Pa.	4.53395	3.47833	13.7145	25.138	9.01586	11.6394		Des. Pa.	8.30811	3.65942	14.4406	15.0927	7.17753	1.28541		Des. Pa.	8.52475	5.53887	11.5855	17.3524	10.5676	2.81247
NX + L	269	151.5	131.1	138
	271	164.42
	278	127.5																						NX	NX+PV	NX+ PV+L	NX + L
NX+PV+L	272	168.42	130.5	125.16																			30	157	173	162	154
	273	138																					60	166	157	142	131
	274	123.5																					90	172	155	137	140
NX+PV+L	275	154.87	145	150.8																			% reduçao (60 dias)	6	-9	-12	-15
	277	119																					% reduçao (90 dias)	9	-11	-16	-10

## Sheet: Bioquímica e eritrograma
BIOQÚIMICA E ERITROGRAMA																																2012
																		CN															Cálcio	Fósforo	Potássio	Sódio	Uréia	Creatinina	PCR	Hematocrito	Hemoglobina	Hemacias	TGO	TGP	COL total	triglic	HDL	VLDL	LDL
CN	Cálcio	Fósforo	Potássio	Sódio	Uréia	Creatinina	PCR	Hematocrito	Hemoglobina	Hemacias	TGO	TGP	COL total	triglic	HDL	VLDL	LDL														CN	167	9.6	7.1	5.5	135	37.1	0.44		43.5	15.2	8.98
54	9.6	5.1	5.2	137	43.5	0.19	0.03																								NX	169	10.4	6.1	5.2	133	99.6	0.95		48.33	14.5	8.71
56	9.7	6.6	5.8	137	46.8	0.16	0.04																								NX	176 (60d)	3.9	23.7	8.9	147	511	2.58		36.4	12	7
72	9.4	6.6	7.3	131	54.6	0.16	0.04	42.1	10.8	6.22																					NX	182(30d)		5.8			169.6	1.28		39.2	13	7.34
108	9.7	6.8	4.8	137	48	0.48																									NX CAUT	174	10	8	4.8	134	66	0.54	0
114	9.6	7.9	9.1	136	52.4	0.44		43.3	15.2	8.86																					NX	178	9.44	8.4	5.2	142	95	0.71	0	38.3	12.9	6.82
121	9.2	7	6.3	136	39.5	0.46		40.3	15.1	9.13																					NX	179	6.64	14.4	5.9	143	695	4.55	0	16.7	5.7	3.13
167	9.6	7.1	5.5	135	37.1	0.44		43.5	15.2	8.98																					NX	177	9.5	7.2	5.4	141	111	0.94		6.89	13	38.7
		6.72857																													NX	208(60d)	5.92	37.1		119	1140	4.46		6.47	12.4	31.9	499	279	235	279	67	55.8	112.2
		0.781417																													NX	194	8.88	8.1	5	139	74.8	0.53		6.12	11.2	32.7	152	55	93	73	47	14.6	31.4
																															NX	207	8.72	8.8	5.5	139	151.8	1.34		4.61	13.7	39.3	101	51	146	80	34	16	96
média	9.54286	6.06778	5.81667	135.571	45.9857	0.332857	0.0366667	42.3	14.075	8.2975																					NX	185	9	10.3	9.2	138	191.5	1.43		7.28	13.1	38.5
Des. Pa.	0.167819	1.99201	0.811206	1.98977	5.94341	0.141897	0.00471405	1.27279	1.89126	1.20325	#DIV/0!	#DIV/0!	#DIV/0!	#DIV/0!	#DIV/0!	#DIV/0!	#DIV/0!														NX	186	9.6	7.6	4.6	141	73.9	0.67		7.28	13.1	38.5
CN + PV	Cálcio	Fósforo	Potássio	Sódio	Uréia	Creatinina	PCR	Hematocrito	Hemoglobina	Hemacias	TGO	TGP	COL total	triglic	HDL	VLDL	LDL														NX CAUT	188	9.2	7.8	5.7	140	75.4	0.73		9.31	15.7	45.7
94	5.56	7.7	5.7	136	59.1	0.18	0.02	43.9	15.1	8.19																					NX CAUT	205	9.4	8.2	6.8	138	143.1	1.08		39.3	13.9	7.7	136	55	176	40	60	8	108
100	8.64	7.1	4.6	142	61.1	0.29	0	44.7	14.6	8.28																					NX	222	9.9	9.8	6.1	142	126.2	1.06		46.4	15.5	8.2	162	67	151	50	54	10	87
101	7.84	9.7	5	143	49.7	0.3	0	45	14.5	8.26																					NX	223	8.9	8	4.6	134	72.7	1.07		47.4	16.4	8.77	172	55	144	108	49	21.6	73.4
106	8.8	9.1	5.8	138	49.3	0.28	0	42.5	15	9.2																					NX +PV	213	10.2	10.5	6.3	142	112.5	1.3		38.8	12.6	7.06	188	69	306	173	76	34.6	195.4
129	9.28	6.6	4.8	138	35.7	0.34		38.9	13.4	8.15																					NX CAUT	215	8.4	11	7.5	140	467.5	3.23		22	7.4	3.84	74	63	334	141	96
160	8.01	8.1	5	137	50.3	0.28		43.2	14.6	8.4																					NX CAUT	221	9.12	7.9	6.3	134	126	1.05		42.2	14.5	7.6	108	65	386	406	95		210
		8.05																													NX+L	231	9.36	7	6.4	134	150	0.86		41.8	14.3	7.62	236	96	151	138	51	27.6	72.4
		1.07665																													NX+L	236	10.24	7.7	5.1	136	88.2	0.71		42.5	14.8	7.9	105	46	318	366	89	73.2	155.8
																															NX+L	240	10.16	7.7	6.7	134	109	0.85		43.6	14.8	7.73	95	58	169	206	60	41.2	67.8
																																	Cálcio	Fósforo	Potássio	Sódio	Uréia	Creatinina	PCR	Hematocrito	Hemoglobina	Hemacias	TGO	TGP	COL total	triglic	HDL	VLDL	LDL
média	8.02167	7.17833	5.15	139	50.8667	0.278333	0.005	43.0333	14.5333	8.41333																					NX+L	242	10.08	7.3	5.9	138	153.6	1.1		41.2	13.7	7.06	97	54	280	163	73	32.6	174.4
Des. Pa.	1.2017	2.48757	0.446281	2.58199	8.23279	0.0484481	0.00866025	2.03279	0.552771	0.360447	#DIV/0!	#DIV/0!	#DIV/0!	#DIV/0!	#DIV/0!	#DIV/0!	#DIV/0!														NX+L	251	8	16.7	8.2	132	792.9	6.58		31.3	10.8	5.87	145	127	219	196	63	39.2	116.8
Nx	Cálcio	Fósforo	Potássio	Sódio	Uréia	Creatinina	PCR	Hematocrito	Hemoglobina	Hemacias	TGO	TGP	COL total	triglic	HDL	VLDL	LDL														NX+PV+L	241	9.36	7.1	6.6	139	152.2	1.05		42.3	14.4	7.7	116	65	179	130	53	26	100
93	7	17.5	6.9	140	635.6	3.67	0.03	19.9	6.8	4.01																					NX+PV+L	248	9.84	6.0	4.9	141	142.6	1.01		43.4	14.2	7.6	131	59	227	246	57	49.2	120.8
109	8.48	10.8	9.4	140	260.2	1.82		40.5	13.4	8.09																					NX+PV+L	255	9.04	1.1	5.1	139	328.2	2.3		36	12	6.51	117	49	154	190	43	18	93
162	7.1	13.6	7.6	139	373.5	2.4		31.5	10.5	6.05																					NX+PV+L	259	9.7	6.9	5.3	136	126	1.02		41.5	14	7.57	103	62	182	220	58	44	80
169	10.4	6.1	5.2	133	99.6	0.95		48.33	14.5	8.71
178	9.44	8.4	5.2	142	95	0.71	0	38.3	12.9	6.82
179	6.64	14.4	5.9	143	695	4.55	0	16.7	5.7	3.13
177	9.5	7.2	5.4	141	111	0.94		38.7	13	6.89																								7
207	8.72	8.8	5.5	139	151.8	1.34		39.3	13.7	4.61	101	51	146	80	34	16	96																	7.7
222	9.9	9.8	6.1	142	126.2	1.06		46.4	15.5	8.2	162	67	151	50	54	10	87																	7.7
223	8.9	8	4.6	134	72.7	1.07		47.4	16.4	8.77	172	55	144	108	49	21.6	73.4																	7.3
																																		16.7
																																		9.28
																																		3.71935
média	8.608	10.46	6.18	139.3	262.06	1.851	0.01	36.703	11.7778	6.528	145	57.6667	147	79.3333	45.6667	15.8667	85.4667
Des. Pa.	1.23351	3.43779	1.35926	3.16386	219.769	1.23839	0.0141421	10.3965	3.22655	1.92441	31.3794	6.79869	2.94392	23.6831	8.49837	4.73662	9.2899
	Cálcio							Fósforo						Potássio							Sódio							Uréia							Creatinina							Hematócrito							Hemoglobina
CN	CN + PV	Nx	Nx + PV	NX+PV+L	NX+L		CN	CN + PV	Nx	Nx + PV	NX+PV+L	NX+L		CN	CN + PV	Nx	Nx + PV	NX+PV+L	NX+L		CN	CN + PV	Nx	Nx + PV	NX+PV+L	NX+L		CN	CN + PV	Nx	Nx + PV	NX+PV+L	NX+L		CN	CN + PV	Nx	Nx + PV	NX+PV+L	NX+L		CN	CN + PV	Nx	Nx + PV	NX+PV+L	NX+L		CN
9.54	8.02	8.6	9.13	9.54	9.32		6.72	8.04	10.46	8.2	5.94	7.35		5.8	5.18	6.18	5.8	5.96	5.75		135.6	139.4	139.3	140.1	137.2	134.75		45.99	50.98	262.1	153.3	137.58	109.83		0.33	0.27	1.85	1.1	1.08	0.86		41.9	42.3	36.7	36	42.4	41.5		14.07
Nx + PV	Cálcio	Fósforo	Potássio	Sódio	Uréia	Creatinina	PCR	Hematocrito	Hemoglobina	Hemacias	TGO	TGP	COL total	triglic	HDL	VLDL	LDL				NX+PV+L	Cálcio	Fósforo	Potássio	Sódio	Uréia	Creatinina	PCR	Hematocrito	Hemoglobina	Hemacias	TGO	TGP	COL total	triglic	HDL	VLDL	LDL				NX+L	Cálcio	Fósforo	Potássio	Sódio	Uréia	Creatinina	PCR
52	8	8.8	5.8	138	77.1	0.5	0.05														241	9.36	7.1	6.6	139	152.2	1.05		42.3	14.4	7.7	116	65	179	130	53	26	100				242	10.08	7.3	5.9	138	153.6	1.1
53	9.2	8.4	5.3	139	60.5	0.35	0.04														248	9.84	6	4.9	141	142.6	1.01		43.4	14.2	7.6	131	59	227	246	57	49.2	120.8				231	9.36	7	6.4	134	150	0.86
55	10.4	8.5	4.5	139	112.8	0.82	0.04														259	9.7	6.9	5.3	136	126	1.02		41.5	14	7.57	103	62	182	220	58	44	80				267	8.64	8.1	5.3	132	53.8	0.62
102	9	7.2	4.6	144	252.9	1.89	0.06	36	12.8	7.36											272	9.44	7.6	7	133	144	1.3					89	45	166	87	39	17.4	109.6				269	9.2	7	5.4	135	81.9	0.85
110	9.28	7.3	7	141	223.4	1.54		33.2	11.8	7.3											275	9.36	7.1	6	137	123.1	1.06					143	81	252	181	68	36.2	147.8
151	7.84	6.7	7.1	138	234	1.34					456	124
213	10.2	10.5	6.3	142	112.5	1.3		38.8	12.6	7.06	188	69	306	173	76	34.6	195.4
média	9.13143	8.2	5.8	140.143	153.314	1.10571	0.0475	36	12.4	7.24	322	96.5	306	173	76	34.6	195.4				média	9.54	6.94	5.96	137.2	137.58	1.088	#DIV/0!	42.4	14.2	7.62333	116.4	62.4	201.2	172.8	55	34.56	111.64				média	9.32	7.35	5.75	134.75	109.825	0.8575	#DIV/0!
Des. Pa.	0.905782	1.18563	0.982708	2.09956	74.7088	0.523173	0.00829156	2.28619	0.432049	0.129615	134	27.5	0	0	0	0	0				Des. Pa.	0.195141	0.523832	0.781281	2.71293	11.1707	0.107592	#DIV/0!	0.778888	0.163299	0.0555778	19.2416	11.5516	32.7011	58.0462	9.40213	11.6092	22.5042				Des. Pa.	0.513809	0.45	0.438748	2.16506	43.1535	0.169761	#DIV/0!
																			proteinúria			TCP
		Cálcio	Fósforo	Potássio	Sódio	Uréia	Creatinina	PCR	Hematocrito	Hemoglobina	Hemacias	TGO	TGP	COL total	triglic	HDL	VLDL	LDL	30	60	90	30	60	90	Peso RIM	peso CORAÇ
	CN	9.54286	6.72857	5.81	135.571	45.9857	0.332857	0.0366667	42.3	14.075	8.2975								17.2429	20.2	22.6786	120.226	119.578	119.615	1.48	1.25
	CN+PV	8.02167	8.05	5.15	139	50.8667	0.278333	0.005	43.0333	14.5333	8.41333														1.51	1.3
	NX	8.608	10.46	6.18	139.3	262.06	1.851	0.01	36.703	11.77	6.528	145	57.6667	147	79.3333	45.6667	15.8667	85.4667	89.01	203.94	288.16	157.043	166.38	171.713	1.82	1.55
	NX+PV	9.13143	8.2	5.8	140.143	153.314	1.10571	0.0475	36	12.4	7.24	322	96.5	306	173	76	34.6	195.4	122.657	170.729	165.527	173.66	157.052	155.419	1.98	1.27
	NX+PV+L	9.54	6.94	5.96	137.2	137.58	1.088	#DIV/0!	42.4	14.2	7.62333	116.4	62.4	201.2	172.8	55	34.56	111.64	143.667	98.81	222.267	163.61	144.7	137.1	2.17	1.615
	NX+L	9.32	7.35	5.75	134.75	109.825	0.8575	#DIV/0!	41.5	14	7.34	144	71.5	220	185.25	64.25	37.05	118.7	112	88.8	164.6	147.93	131.64	140.75	1.94	1.385
		TGO	TGP
	NX	145	57.67
	NX+PV	322	96.5
	NX+PV+L	116.4	62.4
	NX+L	144	71.5
[truncated: 11 more columns]

## Sheet: Pesos corpóreo e órgãos
Peso Corpóreo (g)
CN	0 dias								30 dias- início do tratamento								60 dias- 1º mês de tratamento								90 dias - 2º mês de tratamento							120 dias - 3º mês de tratamento
54	156	169	175	197	204	222	228	226	238	241	246	250	255	258	260	262	273	271	284	285	286	286	289	293	300	299	299	300	303	299	298	309	312	321	319
56	188	195	202	235	252	269	280	286	299	305	315	312	325	327	330	335	343	342	356	355	356	364	360	366	369	372	373	377	386	380	378	392	390	394	393
72	173	199	204	220	230	248	250	259	261	268	273	278	289	289	303	303	308	303	321	324	331	330	334	337	342	332	342	341	348	344	347	343	354	358	369
108	232	238	236	243	258	262	274	284	283	288	285	290	303	298	297	296	339	306	316	316	317			320
114	267	259	262	279	287	296	308	316	329	317	325	335	340	336	343	337	360	351	370	369	375			380
121	281	291	288	299	304	308	313	316	314	324	331	324	334	326	339	334	348	356	362	373	371			375
167	257	265	281	292	306	309	321	332	329	337	338	354	359	365	408	375	378	385	399	400	400	408	411	418
141	230
média	223	230.857	235.429	252.143	263	273.429	282	288.429	293.286	297.143	301.857	306.143	315	314.143	325.714	320.286	335.571	330.571	344	346	348	347	348.5	355.571	337	334.333	338	339.333	345.667	341	341	348	352	357.667	360.333	#DIV/0!	#DIV/0!
Des. Pa.	43.0116	40.9754	40.1848	35.7708	35.5005	30.2648	31.9955	34.2422	32.1101	31.2841	31.8498	33.125	32.6059	32.5464	42.9675	33.7288	32.2794	35.9955	36.0198	36.567	36.0951	44.7772	44.1277	38.7404	28.3901	29.8478	30.3425	31.4572	33.9248	33.1361	32.9343	34.0686	31.8748	29.8031	30.8257	#DIV/0!
CN + PV	0 dias								30 dias- início do tratamento								60 dias- 1º mês de tratamento								90 dias - 2º mês de tratamento							120 dias - 3º mês de tratamento
94	185	177	202	212	230	236	254	253	263	250	264	266	274	280	282	280	284	286	292	304	307	306	312	310	316	313	320	316	328	321
100	198	223	236	237	258	262	283	285	294	284	301	298	307	311	311	315	327	323	320	335	341	345	353	346	357	339	367	359	357	361
101	248	235	250	251	273	277	297	300	299	298	315	321	333	338	336	342	349	339	341	347	354	359	367	366	375	377	379	379	373	375
106	216	216	214	237	244	255	269	270	269	263	273	263	277	284	290	299	299	309	316	316	321	318	309	328	328	330
107	245	217	222	254	267	286	301	305	306	331	319	308	325	335	339	354	351	366	381	376	374	380	369	389	395	391
129	266	265	262	284	300	307	315	317	319	326	335	333	340	342	350	358	365	376
160
média	226.333	222.167	231	245.833	262	270.5	286.5	288.333	291.667	292	301.167	298.167	309.333	315	318	324.667	329.167	333.167	330	335.6	339.4	341.6	342	347.8	354.2	350	355.333	351.333	352.667	352.333	#DIV/0!	#DIV/0!	#DIV/0!	#DIV/0!	#DIV/0!
Des. Pa.	28.8944	26.156	20.6478	21.7977	22.1886	22.7944	20.443	21.723	19.7793	29.95	25.2614	26.1497	25.9658	25.364	25.5539	28.9233	29.18	31.2486	29.8731	25.0807	23.6694	26.882	26.3211	27.759	29.1575	29.3258	25.4602	26.2848	18.625	22.8813	#DIV/0!	#DIV/0!	#DIV/0!	#DIV/0!	#DIV/0!	#DIV/0!
Nx	0 dias								30 dias- início do tratamento								60 dias- 1º mês de tratamento								90 dias - 2º mês de tratamento							120 dias - 3º mês de tratamento
93	191	189	207	211	232	235	267	273	280	278	295	294	298	305	302	306	293	294	309	305	296	286	273
109	232	199	199	207	215	232	236	240	261	265	264	272	263	267	262	265	272	264	273	266	277	277	281
162
169	204	174	184	211	225	239	240	252	252	260	257	265	272	275	267	282	286	282	291	300	301	298	300	infundido
177	139	151	163	173	198	194	201	229	234	235	242	247	254	259	264	270	273	274	286	292	297	300	302	infundido
178	160	159	168	172	207	203	217	248	254	253	258	256	259	265	271	284	284	291	299	308	314	315	320	infundido
179	144	154	146	177	190	203	215	235	245	245	216	237	256	266	271	286	289	289	275	273	273	273	261	infundido
207	228	200	213	218	269	238	233	234	243	276	285	297	296	311	305	295	315	314	329	325	318	321	320	infundido
222	180	220	196	182	191	196	233	242	253	260	273	273	283	278	275	285	286	303	269	289	242	298	291	280	perfusão
223	206	202	212	232	236	240	260	272	277	287	295	300	303	300	294	311	330	343	338	342	352	357	353	326	perfusão
289	218	223	239	256	272	294	309	319	327	345	351	356	359	360	361	367	376	369	365	345	356	340	337	330	327
282	199	201	230	242	257	277	280	281	289	292	295	301	309	317	330	341	348	351	350	366	377	379	379	380	380
284	191	205	213	223	233	248	260	287	307	320	327	333	339	347	354	364	369	376	371	340	326	300	286	290	285
média	191	189.75	197.5	208.667	227.083	233.25	245.917	259.333	268.5	276.333	279.833	285.917	290.917	295.833	296.333	304.667	310.083	312.5	312.917	312.583	310.75	312	308.583	321.2	#DIV/0!	#DIV/0!	#DIV/0!	#DIV/0!	#DIV/0!	#DIV/0!	#DIV/0!	#DIV/0!	#DIV/0!	#DIV/0!	#DIV/0!
Des. Pa.	29.2005	23.6189	26.5503	26.6656	27.2105	29.8416	29.2388	26.0651	26.9274	30.1118	35.1279	33.3453	32.0116	32.01	33.6361	33.3075	35.4459	36.3444	35.0273	29.7614	36.7721	30.9435	33.2	35.2953	#DIV/0!	#DIV/0!	#DIV/0!	#DIV/0!	#DIV/0!	#DIV/0!	#DIV/0!	#DIV/0!	#DIV/0!	#DIV/0!	#DIV/0!	#DIV/0!
Nx + PV	0 dias								30 dias- início do tratamento								60 dias- 1º mês de tratamento								90 dias - 2º mês de tratamento							120 dias - 3º mês de tratamento
52	184	150	125	128	160	192	192	181	173	181	198	210	241	248	266	270	280	287	291	293	304	296	301	305	308	312	315	319	319	330	325	334	335	336
53	166	132	122	151	176	198	212	216	221	234	233	238	244	246	255	261	267	269	281	285	285	288	294	306	303	304	305	309	322	321	313	328	327	331
55	176	151	177	207	225	238	248	252	261	268	272	278	283	280	288	297	303	303	313	313	321	319	323	325	327	335	333	335	336	338	337	340	341	344
82	204	162	197	209	234	234	261	243	262	240	256	255	234	253	257	252	239
102	212	195	194	216	227	246	247	250	247	255	253	210	263	269	267	273
110	205	170	175	207	211	216	199	212	216	220	223	234	239	246	241	251	255	253	255	257	255
118	271	240	236	210	236	251	246	252	265	270	268	279	283	242	250	264	272	243
213	240	213	225	245	242	269	273	281	286	297	305	326	306	307	298	327	330	345	343	331	322	319	270	328	330
285	199	215	245	256	279	280	282	283	286	289	291	293	302	309	309	313	315	320	332	334	328	333	336	339	341
297	191	205	209	211	213	221	228	239	248	256	277	290	300	301	307	311	315	319	327	322	319	318	305	296	297
299	180	189	191	207	215	219	223	228	237	237	245	255	259	362	267	281	292	300	305	307	317	322	321	329	332
média	202.545	183.818	190.545	204.273	219.818	233.091	237.364	239.727	245.636	249.727	256.455	260.727	268.545	278.455	273.182	281.818	286.8	293.222	305.875	305.25	306.375	313.571	307.143	318.286	319.714	317	317.667	321	325.667	329.667	325	334	334.333	337	#DIV/0!
Des. Pa.	28.9588	31.8428	38.1775	34.7068	30.4237	26.214	27.9098	28.464	31.5948	31.1888	29.5061	34.6858	26.0746	36.1043	22.4735	25.052	27.7482	31.5692	27.3562	24.2938	23.1837	14.5882	20.2515	14.6747	15.5629	13.1403	11.5854	10.7083	7.4087	6.94422	9.79796	4.89898	5.73488	5.35413	#DIV/0!	#DIV/0!
Peso Corpóreo
CN	222	230.857	235.429	252.143	263	273.429	282	288.429	293.286	297.143	301.857	306.143	315	314.143	325.714	320.286	335.571	330.571	344	346	348	347	348.5
CN + PV	226.333	222.167	231	245.833	262	270.5	286.5	288.333	291.667	292	301.167	298.167	309.333	315	318	324.667	329.167	333.167	330	335.6	339.4	341.6	342
Nx	191	190	197	209	227	233	237	245	258	260	260	266	274	280	286	290	300	304	313	313	311	312	309
Nx + PV	203	184	190	204	220	233	237	240	246	250	256	261	269	278	273	282	287	293	306	305	306	314	320
NX+PV+L	190.2	191.6	201.6	210.6	215.4	240	249.8	258	265	263.8	267	265.6	273.2	280.6	282.2	276.2	283.8	284.4	287.8	290	293	292.8	293.8
NX+L	215.5	233.25	244	254	262.5	271.25	276	289.25	300.75	298	304	301.25	318.333	318.5	325.5	329	333.25	335	333.25	337.5	344	350	344
peso
MEDIA	SHAM	SHAM + RP	Nx	Nx + RP			ualb	MEDIA	SHAM	SHAM + RP	Nx	Nx + RP
0	222	226	220	221				30	16.7	15.9	89.3	94.5
30	293	292	258	246				60	19.5	18.5	215.5	175.3
60	335	329	300	293				90	21.8	18.1	291.4	179.3
90	349	342	309	320
peso
DP	SHAM	SHAM + RP	Nx	Nx + RP			ualb	DP	SHAM	SHAM + RP	Nx	Nx + RP
0	43	29	29	29				30	6.4	5.8	37.4	33
30	32	20	27	31				60	3.6	4.8	73	56.3
60	33	29	35	28				90	6.9	3	46.9	60.8
90	28	29	33	20
							tcp	MEDIA	SHAM	SHAM + RP	Nx	Nx + RP
								30	118	113	156	167
								60	119	107	162	147
								90	119	105	169	151
Peso dos órgãos							tcp	DP	SHAM	SHAM + RP	Nx	Nx + RP
								30	2.2	3.3	11.5	15.9
								60	8.1	3.3	15.8	13.5																Grupo	Nº	Dias	RIM (g)	Coração(g)
								90	7.9	5	16.5	16.3																Nx	176	60	1606	1417
																												Nx	182	30	0.854	1050
	CN	rim (g)	coração (g)		CN + PV	rim (g)	coração (g)		Nx	rim (g)	coração (g)		Nx + PV	rim (g)	coração (g)		Nx+PV+L	rim (g)	coração (g)		Nx+L	rim (g)	coração (g)					Nx	169	90	1.98	1.22
	54	1.34	1.12		94	1.26	1.12		93	1.28	1.39		52	2.39	1.24		241	2.04	1.89		242	2.41	1.42					CN	167	90	1348	1237
	56	1.73	1.2		100	1.42	1.13		109	1.98	1.59		53	2.23	1.16		248	2.31	1.34		231	1.47	1.35					Nxcaut	174	90	2.07	2.16
	72	1.53	1.3		101	1.49	1.55		162	1.8	1.45		55	1.96	1.35		259	1.47	1.35		267	2.13	1.79					Nx	177	90	1.63	1.48
	108	1.26	1.09		106	1.68	1.29		169	1.98	1.22		102	1.75	1.21		272	1.74	1.63		269	1.81	1.73					Nx	178	90	1.52	1.7
	114	1.69	1.47		107	1.48	1.58		177	1.63	1.48		110	1.59	1.42		275	2.61	1.38									Nx	179	90	2.16	1.6
	121	1.5	1.34		129	1.75	1.16		178	1.52	1.7		151	1.726	1.767													Nx	185	90	2.55	1.81
	167	1.35	1.24		160		1.2		179	2.16	1.6		213	2.77	1.71													Nx	186	90	2.27	1.71
	141	1.746	1.201		314		1.3		207	1.76	2.12		285	2.1	1.3													Nxcaut	188	90	2.34	1.46
	316		1.4		324				222	2.36	1.56		297	2	1.5													NX	207	90	1.76	2.12
									223	1.91	1.51		299	1.6	1.3													Nx + Pv	213	90	2.77	1.71
									289																			Nx	222	90	2.36	1.56
									282	2	1.5																	Nx	223	90	1.91	1.51
									284	1.4	1.5																	Nxcaut	205	90	2.26	1.15
									300	1.6	1.5																	Nxcaut	215	90	1.73	1.81
																												Nxcaut	221	90	1.94	1.31
média		1.51825	1.26233			1.51333	1.29125			1.79846	1.54769			2.0116	1.3957			2.034	1.518			1.955	1.5725					NX+PV+L	241	90	2.04	1.89
Des. Pa.		0.190282	0.119085			0.177951	0.170032			0.308135	0.198074			0.376214	0.195654			0.450699	0.21442			0.40575	0.190312					NX+PV+L	248	90	2.31	1.34
	Peso	rim (g)																										Nx+L	242	90	2.41	1.42
	CN	1.52																										Nx+L	231		1.47	1.35
	CN + PV	1.51								Peso	coração (g)																	Nxcaut	291	90	2.6	1.4
	Nx	1.82								CN	1.25																	Nxcaut	292	90	2.1	1.3
	Nx + PV	2.06								CN + PV	1.3																	Nxcaut	293	90	2	1.3
	NX+PV+L	2.03								Nx	1.56																	Nxcaut	294	90	2.1	1.5
	NX+L	1.95								Nx + PV	1.39
										NX+PV+L	1.5
										NX+L	1.57
Nx+PV+L	0 dias								30 dias- início do tratamento								60 dias- 1º mês de tratamento								90 dias - 2º mês de tratamento
241	203	195	185	203	196	218	223	227	246	242	259	240	249	259	263	240	247	245	255	259	270	276	281	274	perfusão
248	203	207	212	230	241	252	265	272	285	285	292	280	284	298	292	284	306	300	304	302	311	318	317	314	perfusão
259	174	160	186	191	215	236	243	246	249	250	242	253	259	264	267	274	278	282	288	292	292	287	291
272	180	183	191	191	191	224	235	255	260	264	264	275	280	286	288	285	287	290	292	291	288	284	270
275	191	213	234	238	234	270	283	290	285	278	278	280	294	296	301	298	301	305	300	306	304	299	310
média	190.2	191.6	201.6	210.6	215.4	240	249.8	258	265	263.8	267	265.6	273.2	280.6	282.2	276.2	283.8	284.4	287.8	290	293	292.8	293.8	294
Des. Pa.	11.7881	18.8637	18.9167	19.7646	19.8655	18.9737	21.5258	21.6056	16.9823	16.2284	16.9941	16.2308	16.6301	16.1938	14.716	19.6408	20.9132	21.2471	17.3482	16.5288	14.1421	14.6068	17.5431	20
Nx+L	0 dias								30 dias- início do tratamento								60 dias- 1º mês de tratamento								90 dias - 2º mês de tratamento
242	227	240	263	264	233	250	260	287	302	300	316	307		317	322	322	341	335	345	348			360	362	360	perfusão
231	204	215	214	238	262	268	266	273	280	271	267	252	295	293	300	306	298	303	285	300	322	330	328	331	333	330	342
267	210	235	244	251	274	277	280	291	304	304	311	317	323	323	334	337	338	337	343	340	343	345
269	221	243	255	263	281	290	298	306	317	317	322	329	337	341	346	351	356	365	360	362	367	375
média	215.5	233.25	244	254	262.5	271.25	276	289.25	300.75	298	304	301.25	318.333	318.5	325.5	329	333.25	335	333.25	337.5	344	350	344	346.5	346.5
Des. Pa.	9.01388	10.9173	18.5876	10.5594	18.3371	14.5495	14.6287	11.7553	13.2924	16.8077	21.7141	29.482	17.4611	17.1683	16.9926	16.778	21.4636	21.9545	28.6215	23.038	18.3848	18.7083	16	15.5	13.5

## Sheet: FULL DATA
			Pretreatment body weight (g)	Final body weight (g)		Uprot (mg/24h)					24h urine volume (mL)				TCP (mmHg)			Serum and blood analysis after 90 days of surgery										Heart weight (g)		Kidney analysis after 90 days of surgery
Group	S					30 days	60 days	90 days		30 days	60 days	90 days		30 days	60 days	90 days		calcium (mmol/L)	phosphorus (mmol/L)	potassium (mmol/L)	sodium (mmol/L)	urea (mg/dl)	BUN (mg/dl)	creatinine (mg/dl)	hematocrit	hemoglobin		90 days		Left kidney weight (g)	TBARS (nmols/24h)	%GS	GSI	INT (pixels)	ED-1 (cells/glomerulus)	ED-1(cells/field)
rats identification numbers	54		227	289		15.8	22.3	17.99		10	10	18		118.727	117.944	128.667		9.6	5.1	5.2	137	43.5	20.3271	0.19				1.12		1.34	66.92	0.76	6.25	780	0.52	1.8
	56		296	366		30	26.3	36		12	12	14		120	105.611	118.222		9.7	6.6	5.8	137	46.8	21.8692	0.16				1.2		1.73	91.54	0.66	6.25	740	0.16	0.56
	72		261	336		21	21	21		11	10	12		114.944	129.667	115.778		9.4	6.6	6	131	54.6	25.514	0.16	42.1	10.8		1.3		1.53	52.31	0	6	860	0.6	0.84
	108		283	320		10.5	17.7	16		12	10	10		119.333	112	109.3		9.7	6.8	4.8	137	48	22.4299	0.55				1.09		1.26	30.05	0	6	805	0.04	0.12
	114		327	390		16.3	16.1	21.6		12	10	12		116.333	126.111	132		9.6	7.9		136	52.4	24.486	0.44	43.3	15.2		1.47		1.69	50.77	0.66	6.25	804	0.24	0.2
	121		314	375		8.1	21.5	33		11	10	12		120.333	127.556	126.5		9.2	7	6.1	136	39.5	18.4579	0.46	40.3	15.1		1.34		1.5	23.08	0.71	6.25	840	0.32	0.6
	167		323	417		19	16.5	15		12	10	10		122	118.16	109.84		9.6	7.1	5.5	135	37.1	17.3364	0.44	43.5	15.2		1.24		1.35	17.31	0	6.25	850	0.3	0.7
	141		316	360		13	14.8	15.8		10	14	10		115	124.1	115		9.6	5	5	136	40	18.6916	0.2				1.201		1.746	55	0.83	6	880	0.08	0.56
	mean		293.375	356.625		16.7125	19.525	22.0488		11.25	10.75	12.25		118.334	120.144	119.413		9.55	6.5125	5.48571	135.625	45.2375	21.139	0.325	42.3	14.075		1.24513		1.51825	48.3725	0.4525	6.15625	819.875	0.2825	0.6725
	SD		32.6226	37.9735		6.40048	3.64374	7.56357		0.829156	1.39194	2.53722		2.4488	7.77152	8.08015		0.158114	0.927951	0.467298	1.86665	5.90147	2.7577	0.151493	1.27279	1.89126		0.115277		0.177993	22.9481	0.354216	0.121031	43.2737	0.18559	0.482072
	SE		11.5338	13.4256		2.26291	1.28826	2.67413		0.293151	0.492125	0.897044		0.865783	2.74765	2.85677		0.0559017	0.32808	0.176622	0.65996	2.08648	0.974993	0.0535607	0.636396	0.945631		0.0407567		0.06293	8.11338	0.125234	0.0427908	15.2995	0.0656161	0.170438
	N		8	8		8	8	8		8	8	8		8	8	8		8	8	7	8	8	8	8	4	4		8		8	8	8	8	8	8	8
			Pretreatment body weight (g)	Final body weight (g)		Uprot (mg/24h)					24h urine volume (mL)				TCP (mmHg)			Serum and blood analysis after 90 days of surgery										Heart weight (g)		Kidney analysis after 90 days of surgery
Group	S + RP					30 days	60 days	90 days		30 days	60 days	90 days		30 days	60 days	90 days		calcium (mmol/L)	phosphorus (mmol/L)	potassium (mmol/L)	sodium (mmol/L)	urea (mg/dl)	BUN (mg/dl)	creatinine (mg/dl)	hematocrit	hemoglobin		90 days		Left kidney weight (g)	TBARS (nmols/24h)	%GS	GSI	INT (pixels)	ED-1 (cells/glomerulus)	ED-1(cells/field)
rats identification numbers	94		263	317		21.2	19.4	15		10	10	12		114.111	110.111	114		5.56	7.7	5.7	136	59.1	27.6168	0.18	43.9	15.1		1.12		1.26	16.92	0.9	6.25	899	0.24	1
	100		294	330		23.8	22.5	16.6		12	12	14		110.444	103	105		8.64	7.1	4.6	142	61.1	28.5514	0.26	44.7	14.6		1.13		1.42	30.51	0	6	789	0.84	0.9
	101		305	375		12.5	18.5	17.5		8	12	12		108.667	108	105		7.84	9.7	5	143	49.7	23.2243	0.3	45	14.5		1.55		1.49	33.85	0	6	845	0.4	0.53
	106		269	328		17	22.3	17		11	10	8		116.556	110.778	103		8.8	9.1	5.8	138	49.3	23.0374	0.28	42.5	15		1.29		1.68	86.05	0.66	6.25	850	0.35	0.48
	107		305	390		20.3	23.4	20		10	10	10		116.111	107.222	103		8	8	5.5	138	40	18.6916	0.3				1.58		1.48	12.82	0.66	6.25	880	0.35	0.48
	129		323	389		6.8	8.9	13		10	12	10		117.444	101.889	100.1		9.28	6.6	4.8	138	35.7	16.6822	0.34	38.9	13.4		1.16		1.75	43.59	0	6	789	0.1	0.18
	160		270	330		10.2	14.5	22		12	8	12		110	110	100		8.01	8.1	5	137	50.3	23.5047	0.28	43.2	14.6		1.2		1.55	89.23	0.66	6.25	725	0.1	0.67
	314		301	330		25	18.9	23.4		12	8	10		115	143	115		5.5	6.2	4.5	138	53.2	24.8598	0.33	45.3	15.3		1.3		1.47	63.46	0.66	6.25	748	0.69	0.55
	mean		291.25	348.625		17.1	18.55	18.0625		10.625	10.25	11		113.542	111.75	105.638		7.70375	7.8125	5.1125	138.75	49.8	23.271	0.28375	43.3571	14.6429		1.29125		1.5125	47.0537	0.4425	6.15625	815.625	0.38375	0.59875
	SD		20.1044	28.5129		6.21711	4.52161	3.28517		1.31696	1.56125	1.73205		3.14782	12.2046	5.41709		1.333	1.11404	0.464859	2.27761	8.07078	3.77139	0.0463512	2.04231	0.577821		0.170032		0.142105	27.6332	0.351061	0.121031	58.4635	0.246523	0.241735
	SE		7.10798	10.0808		2.19808	1.59863	1.16148		0.465615	0.551985	0.612372		1.11292	4.31499	1.91523		0.471288	0.393874	0.164352	0.805256	2.85345	1.33339	0.0163876	0.77192	0.218396		0.0601154		0.0502416	9.7698	0.124119	0.0427908	20.67	0.0871589	0.0854663
	N		8	8		8	8	8		8	8	8		8	8	8		8	8	8	8	8	8	8	7	7		8		8	8	8	8	8	8	8
			Pretreatment body weight (g)	Final body weight (g)		Uprot (mg/24h)					24h urine volume (mL)				TCP (mmHg)			Serum and blood analysis after 90 days of surgery										Heart weight (g)		Kidney analysis after 90 days of surgery
Group	Nx					30 days	60 days	90 days		30 days	60 days	90 days		30 days	60 days	90 days		calcium (mmol/L)	phosphorus (mmol/L)	potassium (mmol/L)	sodium (mmol/L)	urea (mg/dl)	BUN (mg/dl)	creatinine (mg/dl)	hematocrit	hemoglobin		90 days		Left kidney weight (g)	TBARS (nmols/24h)	%GS	GSI	INT (pixels)	ED-1 (cells/glomerulus)	ED-1(cells/field)
rats identification numbers	93		280	280		160.7	379.8	370		46	52	32		171.333	185.111	190		7	17.5	6.9	140	635.6	297.009	3	19.9	6.8		1.39		1.28	250.26	87.76	221.5	3001	4	8.5
	109		261	280		59.1	257.7	240		48	52	50		165	176.778	180		8.48	10.8	9.4	140	260.2	121.589	1.6	40.5	13.4		1.59		1.98	566.67	69.3	210.5	2869	7	16
	162		320	339		40.6	189.7	335.8		34	28	52		165	180	195		7.1	13.6	7.6	139	373.5	174.533	2.4	31.5	10.5		1.45		1.8	326.67	88.41	168.8	3303	3.5	10.7
	169		252	350		91	221.8	297		22	42	58		154	144.5	160		10.4	6.1	5.2	133	99.6	46.5421	0.8	48.33	14.5		1.22		1.98	415.38	41.96	121.3	2600	2.4	6.8
	177		225	315		94.5	159.1	220.4		24	44	32		142.3	161.1	150		9.44	8.4	5.2	142	95	44.3925	0.71	38.3	12.9		1.48		1.63	180.51	45.31	121	2462	1	4.48
	178		254	320		123.3	151.2	256.2		32	44	42		172	176.54	155		6.64	14.4	5.9	143	695	324.766	4.4	16.7	5.7		1.7		1.52	1195.38	43.38	149	3029	0.6	2.32
	179		245	261		114	177.5	215		28	34	38		165	170.46	160		9.5	7.2	5.4	141	111	51.8692	0.94	38.7	13		1.6		2.16	112.05	72.15	188.8	2007	5	9.8
	207		245	345		51.8	159.1	340		65	38	50		152	157.33	160		8.72	8.8	5.5	139	151.8	70.9346	1.2	39.3	13.7		2.12		1.76	602.56	88.24	164.8	2930	3.4	6.5
	222		253	291		90.8	163.1	303.5		54	50	40		145	143.58	170		9.9	9.8	6.1	142	126.2	58.972	1	46.4	15.5		1.56		2.36	138.46	43.38	156.8	2865	3.9	8.5
	223		265	353		64.3	180.4	264.5		34	28	65		140	168.4	150		8.9	8	4.6	134	72.7	33.972	1	47.4	16.4		1.51		1.91	274	64.29	184.5	2808	2	7.8
	284		310	266		30	331	324		29	44	44		145	185	190		8.32		9	136	799	373.364	6.6	20.9	6.5		1.5		1.4	575	69	220.8	3022	3.3	8.1
	mean		264.545	309.091		83.6455	215.491	287.855		37.8182	41.4545	45.7273		156.058	168.073	169.091		8.58182	10.46	6.43636	139	310.873	145.268	2.15	35.2664	11.7182		1.55636		1.79818	421.54	64.8345	173.436	2808.73	3.28182	8.13636
	SD		27.1741	33.2058		37.3874	73.0747	49.6315		12.9672	8.22815	9.92784		11.4406	14.1163	16.0706		1.17901	3.43779	1.52868	3.16228	260.259	121.616	1.7802	10.9042	3.60399		0.214191		0.310332	297.01	17.9528	34.0098	330.748	1.72037	3.34689
	SE		8.19329	10.0119		11.2727	22.0329	14.9645		3.90976	2.48088	2.99336		3.44948	4.25623	4.84547		0.355486	1.08712	0.460914	0.953463	78.4709	36.6687	0.53675	3.28773	1.08664		0.0645809		0.0935685	89.552	5.41298	10.2543	99.7244	0.518711	1.00912
	N		11	11		11	11	11		11	11	11		11	11	11		11	10	11	11	11	11	11	11	11		11		11	11	11	11	11	11	11
			Pretreatment body weight (g)	Final body weight (g)		Uprot (mg/24h)					24h urine volume (mL)				TCP (mmHg)			Serum and blood analysis after 90 days of surgery										Heart weight (g)		Kidney analysis after 90 days of surgery
Group	NX+RP					30 days	60 days	90 days		30 days	60 days	90 days		30 days	60 days	90 days		calcium (mmol/L)	phosphorus (mmol/L)	potassium (mmol/L)	sodium (mmol/L)	urea (mg/dl)	BUN (mg/dl)	creatinine (mg/dl)	hematocrit	hemoglobin		90 days		Left kidney weight (g)	TBARS (nmols/24h)	%GS	GSI	INT (pixels)	ED-1 (cells/glomerulus)	ED-1(cells/field)
rats identification numbers	52		202	310		94.3	104.7	145.95		12	18	18		165.857	165.278	155		8	8.8	5.8	138	77.1	36.028	0.5				1.24		2.39	71.54	12.09	39.5	1330	0.5	3.1
	53		221	303		148.6	98	110.18		24	16	14		198.571	162.056	155		9.2	8.4	5.3	139	60.5	28.271	0.35				1.16		2.23	307.67	8.02	30.75	1442	0.32	3.5
	55		270	327		63.7	114	159.23		24	20	22		164.308	145.167	149		10.4	8.5	4.5	139	112.8	52.7103	0.82				1.35		1.96	375.13	12.5	23.75	1765	0.3	8.8
	110		210	330		130.1	169.1	121		44	38	40		153.444	144.778	185		9.28	7.3	7	141	223.4	104.393	1.54	33.2	11.8		1.42		1.59	384.62	68.35	130.75	2116	5	7
	213		286	290		137.7	244.3	191.2		38	42	34		146.06	137.2	149		10.2	10.5	6.3	142	112.5	52.5701	1.3	38.8	12.6		1.71		2.77	399.49	20.11	71.8	2088	1.5	3.5
	285		286	345		76.4	207	301		19	24	36		154	151	135		8.8		5.9	140	129	60.2804	0.91	44.7	15.1		1.3		2.1	147.69	50	220.25	1878	1.2	7.3
	297		250	320		90.4	219	247		40	28	34		185	120	125		10.2		6.2	139	227	106.075	1.98	30.8	10.2		1.5		2	357.44	69.07	160	2689	1.1	4.8
	299		245	333		55	168	159		30	24	20		173	155	155		10		4.6	138	84.5	39.486	0.72	44	14.9		1.3		1.6	156.41	8.4	21.5	1521	0.3	3.4
	mean		246.25	319.75		99.525	165.512	179.32		28.875	26.25	27.25		167.53	147.56	151		9.51	8.7	5.7	139.5	128.35	59.9766	1.015	38.3	12.92		1.3725		2.08	274.999	31.0675	87.2875	1853.62	1.2775	5.175
	SD		30.9223	16.7014		32.9995	52.1036	60.8681		10.4096	8.74285	9.16174		16.41	13.5627	16.3707		0.784028	1.03344	0.803119	1.32288	59.5953	27.8483	0.516188	5.58498	1.86698		0.160526		0.368511	120.971	25.156	69.7676	415.982	1.47379	2.06746
	SE		10.9327	5.90484		11.6671	18.4214	21.5201		3.68034	3.09107	3.23916		5.8018	4.79515	5.78792		0.277196	0.462169	0.283945	0.467707	21.0701	9.84585	0.1825	2.49768	0.834937		0.0567547		0.130288	42.7696	8.89398	24.6666	147.072	0.521062	0.730956
	N		8	8		8	8	8		8	8	8		8	8	8		8	5	8	8	8	8	8	5	5		8		8	8	8	8	8	8	8
